# Supplementary material for: Using 164 Million Google Street View Images to Derive Built Environment Predictors of COVID-19 Cases
Source: MDPI journal article supplement (doi:10.3390/ijerph17176359), 2020-09-01

# Supplemental materials for “Using 164 million Google Street View images to derive built environment predictors of COVID-19 cases”

**Figure 1** Trends of six movement categories using google mobility report data, Feb 15 to Jun 12, 2020, United States.

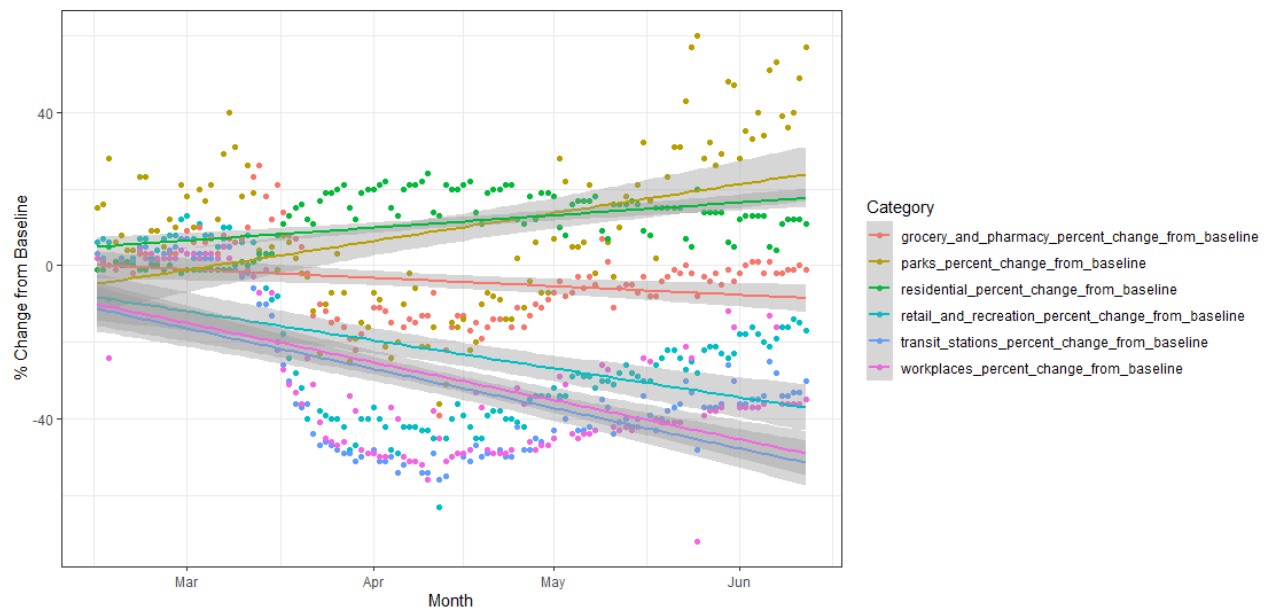

Supplement: s1 [file s1]
